# Supplementary material for: Biogeographic variation in the microbiome of the ecologically important sponge, Carteriospongia foliascens
Source: PubMed Central journal article supplement (PMC4690404; doi:10.7717/peerj.1435), 2015-12-17
Supplement: peerj-03-1435-s006.pdf [file peerj-03-1435-s006.pdf]

**A**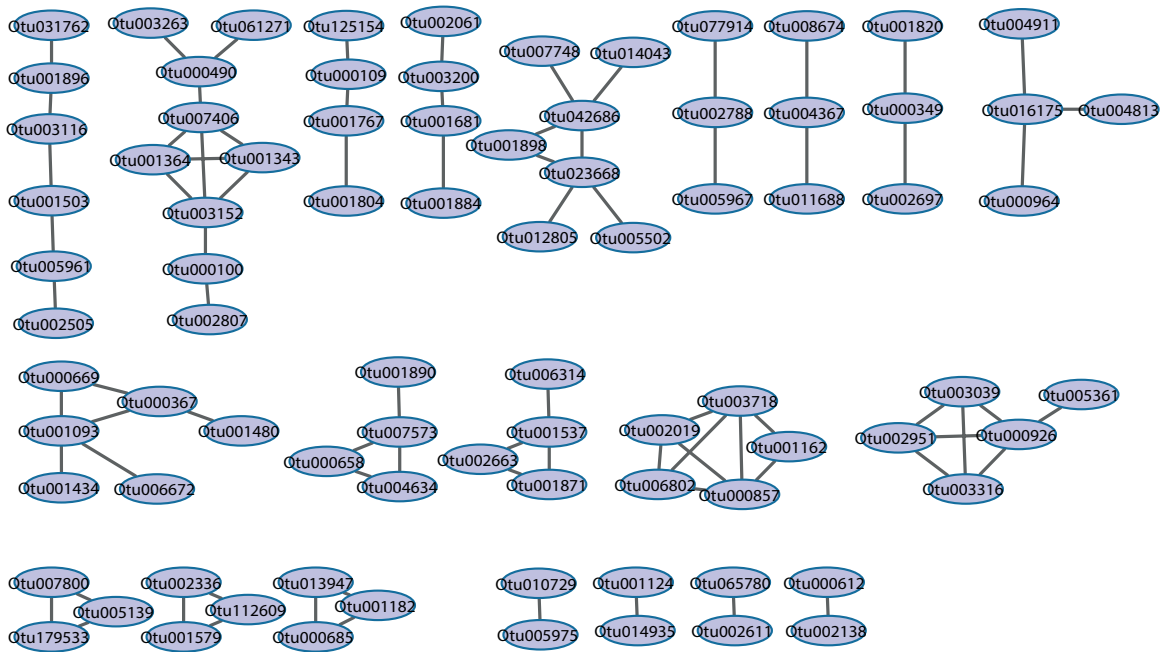**B**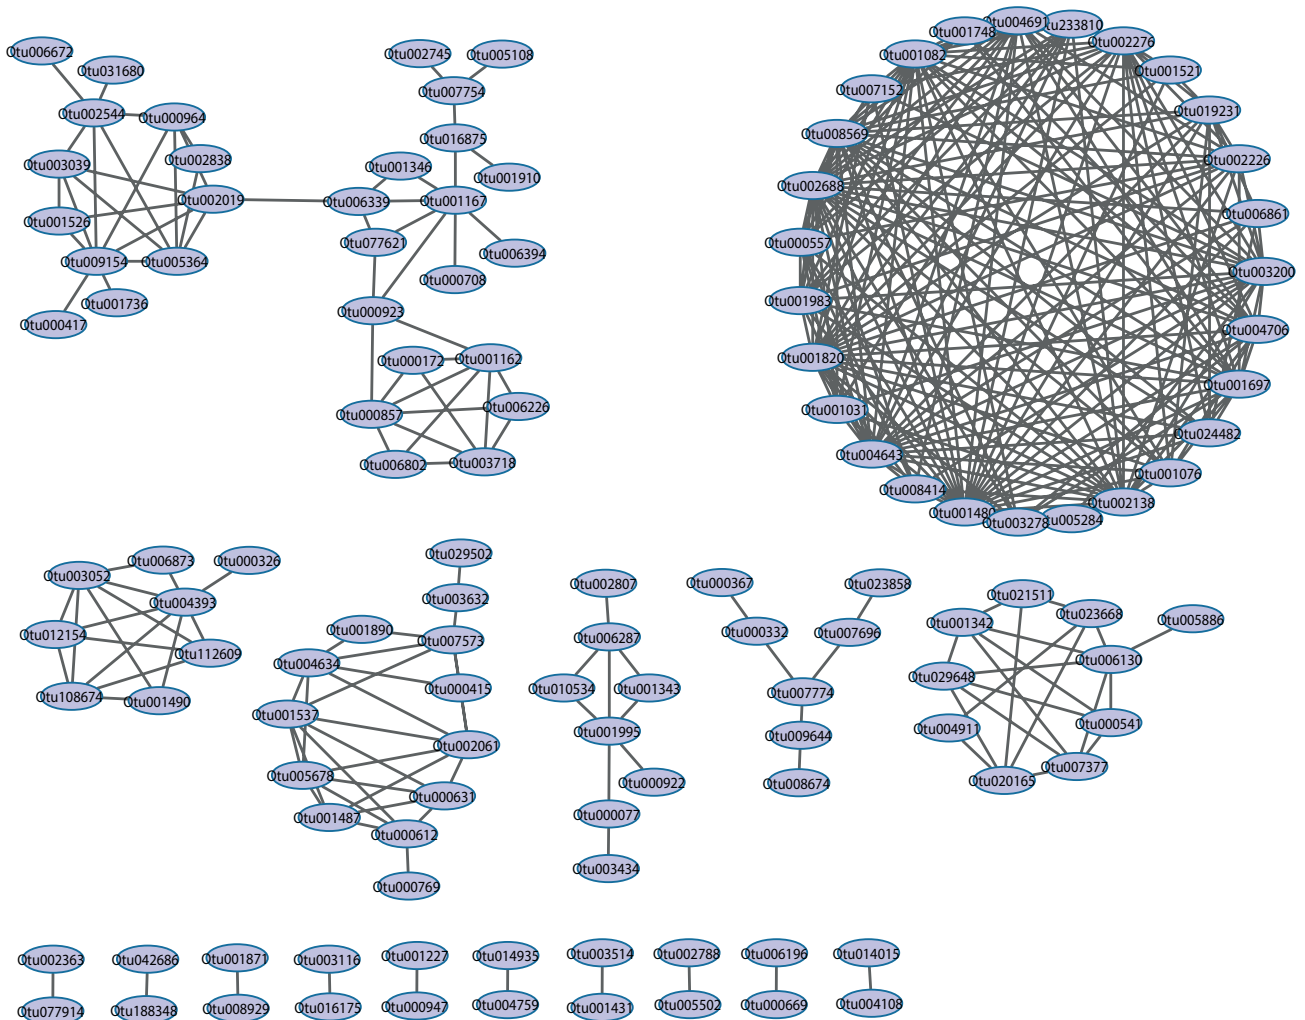

Supp Figure 2. Co-occurrence networks inferred from (A) 15 inshore samples and (B) 15 offshore samples. A significant co-occurrence event (edge) was placed if the SparCC correlation coefficient  $\geq |0.6|$  and  $p \leq 0.03$ . Anti-correlations were removed for visualization. OTU classification denoted within the nodes.
